# Supplementary material for: Biopolymer-Based Composite Hydrogels Embedding Small Silver Nanoparticles for Advanced Antimicrobial Applications: Experimental and Theoretical Insights
Source: MDPI journal article supplement (doi:10.3390/polym15163370), 2023-08-11
Supplement: s1 [file s1]

Supporting Information

# **Biopolymer-based composite hydrogels embedding small silver nanoparticles for advanced antimicrobial applications. Experimental and theoretical insights**

**Moises A. Rojas <sup>1</sup>, John Amalraj <sup>2,\*</sup>, and Leonardo S. Santos <sup>1,\*</sup>**

<sup>1</sup> Laboratory of Asymmetric Synthesis, Instituto de Química de Recursos Naturales, Universidad de Talca, Talca, Chile

<sup>2</sup> Laboratory of Materials Science, Instituto de Química de Recursos Naturales, Universidad de Talca, Talca, Chile

\* Correspondence: [jamalraj@utalca.cl](mailto:jamalraj@utalca.cl) (J.A) and [lssantos@utalca.cl](mailto:lssantos@utalca.cl) (L.S.S)

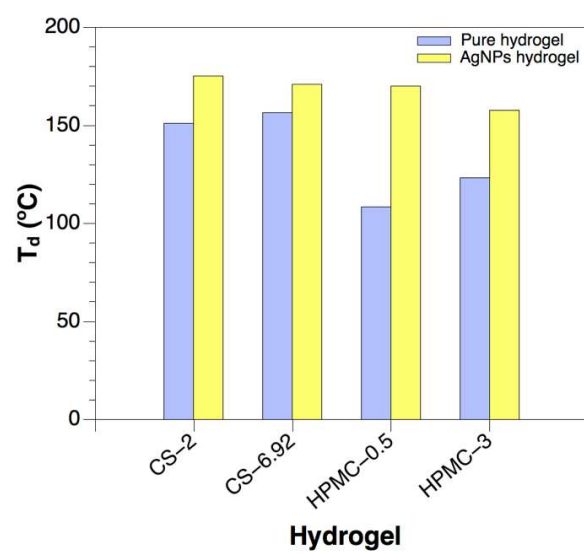

**Figure S1.** Denaturation temperatures ( $T_d$ , °C) for the pure CS and HPMC hydrogels and their silver nanocomposites were measured using DSC.

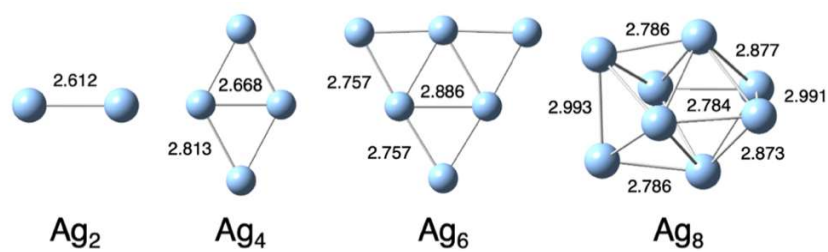

**Figure S2.** Optimized structures of silver nanoclusters ( $\text{Ag}_n$ ) at the B3LYP/LANL2DZ level of theory, with geometries of one ( $n = 2$ ), two ( $n = 4, 6$ ) and three ( $n = 8$ ) dimension. Bond lengths in Å.

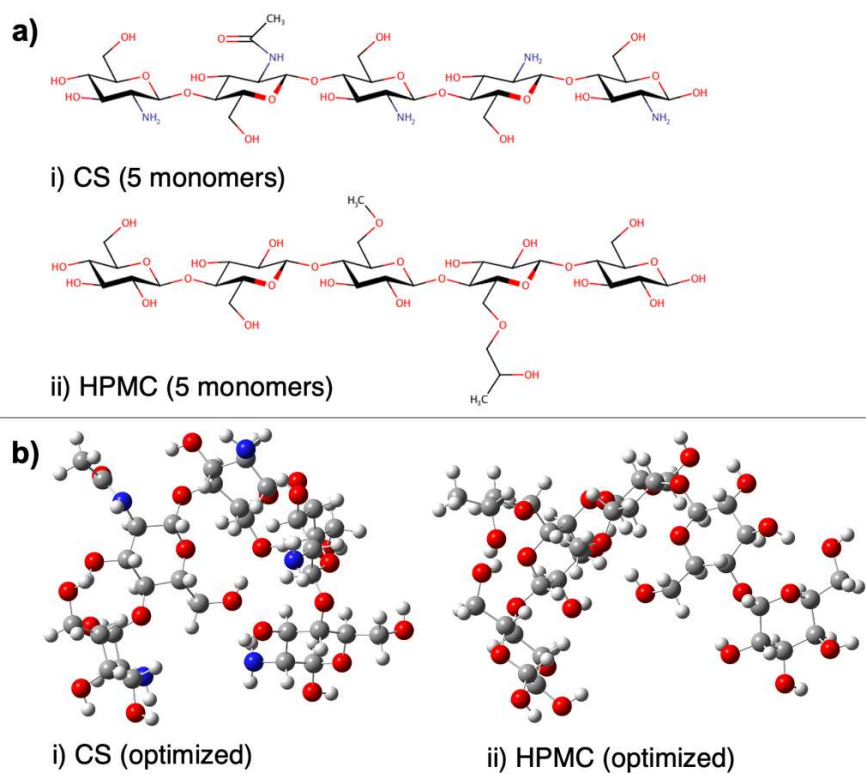

**Figure S3.** Schematic representation of **a)** initial and **b)** optimized molecular models of chitosan (CS) and hydroxypropyl methylcellulose (HPMC), consisting of 5 monomeric units in each case. Notice how both polymeric chains contract after the optimization of their geometries (B3LYP/6-311G(d,p)). (Color legend: Carbon = gray; Hydrogen = white; Oxygen = red; and Nitrogen = blue).

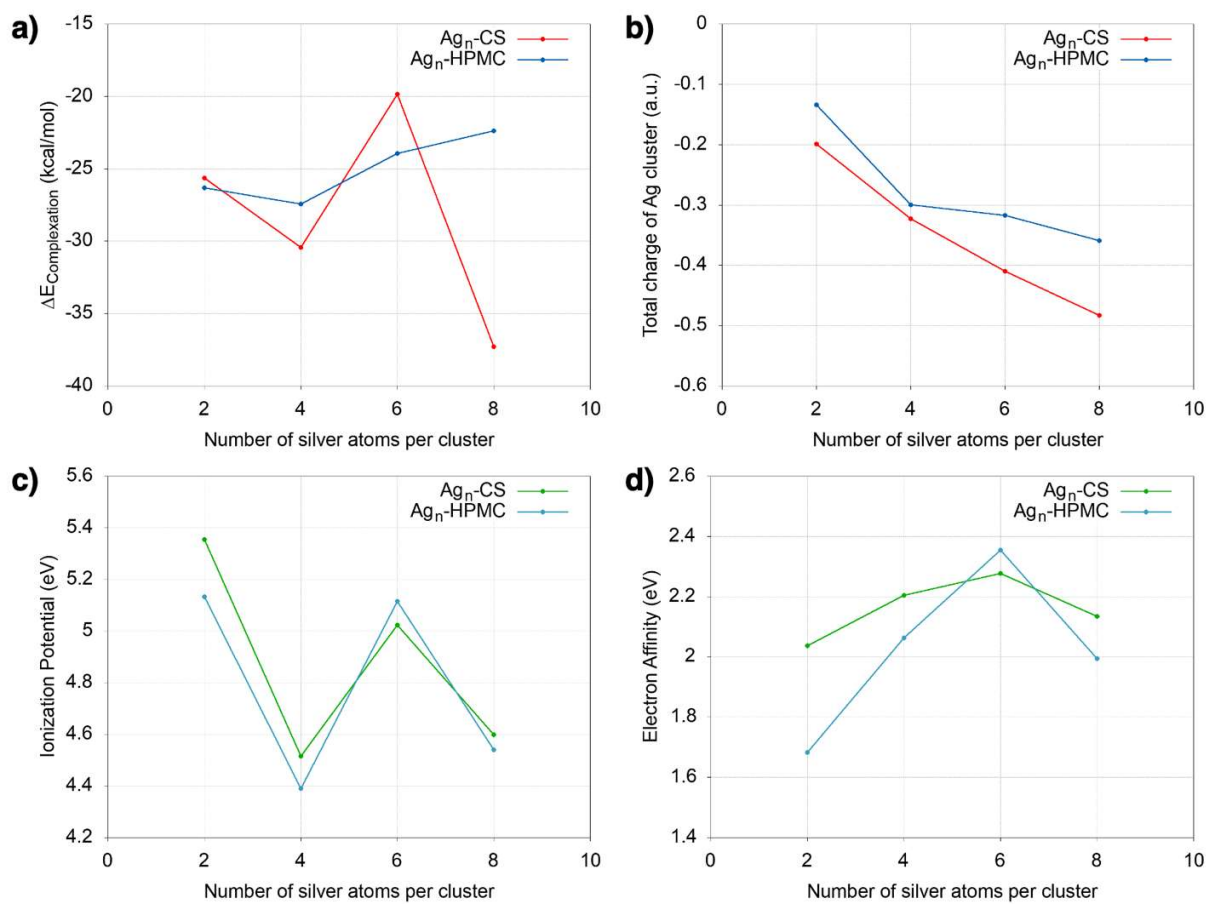

**Figure S4.** Plots of **a)**  $\Delta E_{\text{complexation}}$ , **b)** total charge of silver clusters, **c)** ionization potential (IP), and **d)** electron affinity (EA) of the  $\text{Ag}_n\text{-CS/HPMC}$  complexes in the function of silver atoms per cluster.
